# Supplementary material for: Anti-obesity effect of vegetable juice fermented with lactic acid bacteria isolated from kimchi in C57BL/6J mice and human mesenchymal stem cells
Source: Royal Society of Chemistry journal article supplement (doi:10.1039/d2fo02998g), 2023-01-01
Supplement: d2fo02998g1.pdf [file d2fo02998g1.pdf]

## Electronic Supplementary Material (ESI) for Food & Function.

**Fig. S1. Identification of differentially expressed proteins (DEPs) in human mesenchymal stem cells treated with WiKim39 and WiKim0124 fermented vegetable juices using antibody array.** (a) Array map used in the panel, (b) human antibody array panel used in this study ([Raw image files](#)). The signal intensity of the arrays was analyzed using a densitometer. The relative fold change of proteins was calculated after normalization to the positive control (n = 2). 4-1BB, tumor necrosis factor receptor superfamily; ACE-2, Angiotensin-converting enzyme 2; Acrp30, adiponectin; Adipsin, complement factor D; AgRP, agouti related neuropeptide; Ang-2, angiopoietin 2; Angiopoietin-1, angiopoietin 1; ANGPTL4, angiopoietin like 4; CRP, C-reactive protein; ENA-78, C-X-C motif chemokine ligand 5; Fas, fatty acid synthase; FGF-6, fibroblast growth factor 6; Growth hormone, growth hormone; HCC-4, C-C motif chemokine ligand 16; IFN- $\gamma$ , interferon gamma; IGFBP-1, insulin-like growth factor-binding protein-1; IGFBP-2, insulin-like growth factor binding protein 2; IGFBP-3, insulin-like growth factor binding protein 3; IGF-1, insulin-like growth factor 1; IGF-1R, insulin-like growth factor-I receptor; IGF-1 SR, interleukin 1 receptor-like 4; IL-1 sR1, interleukin 1 soluble receptor 1; IL-10, interleukin 10; IL-11, interleukin 11; IL-12, interleukin 12; IL-1 $\alpha$ , interleukin 1 alpha; IL-1 $\beta$ , interleukin 1 beta; IL-6, interleukin 6; IL-6 sR, interleukin 6 soluble receptor; IL-8, interleukin 8; Insulin, insulin; IP-10, C-X-C motif chemokine ligand 10; Leptin R, Leptin receptor; Leptin, leptin; LIF, leukemia inhibitory factor; Lymphotactin, lymphotactin; MCP-1, monocyte chemoattractant protein-1; MCP-3, monocyte chemoattractant protein-3; MCSF, macrophage colony-stimulating factor; MIF, macrophage migration inhibitory factor; MIF-1 $\beta$ , macrophage migration inhibitory factor 1 beta; MSP $\alpha$ , macrophage stimulating protein alpha; OPG, osteoprotegerin; OSM, oncostatin M; PAI-1,

plasminogen activator inhibitor-1; PARC, pulmonary and activation-regulated chemokine; PDGF-AA, platelet-derived growth factor; PDGF-AB, platelet-derived growth factor; PDGF-BB, platelet-derived growth factor; RANTES, regulated upon activation, normal T cell expressed and presumably secreted; Resistin, resistin; Serum amyloid A, serum amyloid A; SDF-1, stromal cell-derived factor 1; sTNF-R1, soluble tumor necrosis factor receptor type 1; sTNF-R2, soluble tumor necrosis factor receptor 2; TGF- $\beta$ , transforming growth factor beta 1; TIMP1, tissue inhibitor matrix metalloproteinase 1; TIMP2, tissue inhibitor matrix metalloproteinase 2; TNF- $\alpha$ , tumor necrosis factor alpha; VEGF-A, vascular endothelial growth factor A; XEDAR, X-linked ectodermal dysplasia receptor.

**Fig. S2. Effects of WiKim39 and WiKim0124 fermented vegetable juice administration in high-fat diet-induced obese mice.** Plasma AST (aspartate aminotransferase), plasma ALT alanine aminotransferase), plasma ALP (alkaline phosphatase), plasma FFA (free fatty acids), hepatic triglycerides (TG), hepatic total cholesterol (TCHO) were measured. Different letters denote significant differences ( $p < 0.05$ , ANOVA, Tukey's HSD). Values are expressed as the mean  $\pm$  SD.

**Fig. S3.** Effect of LAB and LAB fermented VJ on cell viability (a, c) and adipogenic differentiation (b, d). \* $p < 0.05$  indicates statistically significant differences between NOR and experimental groups, and # $p < 0.05$  indicates statistically significant differences between CON and experimental groups. Values are expressed as the mean  $\pm$  SD ( $n = 3$ ).

Supplementary Table S1. Quantitative reverse transcription-PCR primers used in this study.

|                |         | <b>Primer sequence (5'→3')</b> | <b>Reference</b> |
|----------------|---------|--------------------------------|------------------|
| C/EBP $\alpha$ | Forward | TGGACAAGAACAGCAACGAGTAC        | 38               |
|                | Reverse | GCAGTTGCCCATGGCCTTGAC          |                  |
| PPAR $\gamma$  | Forward | AGGCCGAGAAGGAGAAGCTGTTG        | 39               |
|                | Reverse | TGGCCACCTCTTTGCTGTGCTC         |                  |
| SREBP-1c       | Forward | GGCATGAAACCTGAAGTGGT           | 40               |
|                | Reverse | TGCAGGTCAGACACAGGAAG           |                  |
| FAS            | Forward | GGGACACTCCACACCAGAGT           | 41               |
|                | Reverse | TAGACGTCAGCAGGTCGATG           |                  |
| FABP4          | Forward | AAATCACCGCAGACGACA             | 41               |
|                | Reverse | CACATTCCACCACCAGCT             |                  |
| ATGL           | Forward | AACACCAGCATCCAGTTCAA           | -                |
|                | Reverse | GGTTCAGTAGGCCATTCCTC           |                  |
| HSL            | Forward | ACCGAGACAGGCCTCAGTGTG          | -                |
|                | Reverse | GAATCGGCCACCGGTAAAGAG          |                  |
| $\beta$ -actin | Forward | AGCCATGTACGTAGCCATCC           | -                |
|                | Reverse | TTAAGCCATGCTCTGCAATG           |                  |

## Reference

38. K. Zhu, F. Tan, J. Mu, R. Yi, X. Zhou and X. Zhao, Anti-obesity effects of *Lactobacillus fermentum* CQPC05 isolated from Sichuan pickle in high-fat diet-induced obese mice through PPAR- $\alpha$  signaling pathway, *Microorganisms*, 2019, **7**, 194.
39. Q. Li, Z. Liu, J. Huang, G. Luo, Q. Liang, D. Wang, X. Ye, C. Wu, L. Wang and J. Hu, Anti-obesity and hypolipidemic effects of Fuzhuan brick tea water extract in high-fat diet-induced obese rats, *Journal of the Science of Food and Agriculture*, 2013, **93**, 1310-1316.
40. W. Xie, D. Gu, J. Li, K. Cui and Y. Zhang, Effects and action mechanisms of berberine and *Rhizoma coptidis* on gut microbes and obesity in high-fat diet-fed C57BL/6J mice, *PloS one*, 2011, **6**, e24520.
41. J. N. Ho, J. Y. Jang, H. G. Yoon, Y. Kim, S. Kim, W. Jun and J. Lee, Anti-obesity effect of a standardised ethanol extract from *Curcuma longa* L. fermented with *Aspergillus oryzae* in ob/ob mice and primary mouse adipocytes, *Journal of the Science of Food and Agriculture*, 2012, **92**, 1833-1840.
